# Supplementary material for: Model-based assessment of the safety of community interventions with primaquine in sub-Saharan Africa
Source: PubMed Central journal article supplement (PMC8502297; doi:10.1186/s13071-021-05034-4), 2021-10-09
Supplement: 13071_2021_5034_MOESM1_ESM.pdf [file 13071_2021_5034_MOESM1_ESM.pdf]

**Additional file 1: Table S1. Definition of anemia according the World Health Organization.**

Definition of anemia according to the World Health Organization (1)

| Population                      | No anemia* | Anemia*   |          |        |
|---------------------------------|------------|-----------|----------|--------|
|                                 |            | Mild      | Moderate | Severe |
| Children 6-59 months of age     | ≥11.0      | 10.0-10.9 | 7.0-9.9  | <7.0   |
| Children 5-11 years of age      | ≥11.5      | 11.0-11.4 | 8.0-10.9 | <8.0   |
| Children 12-14 years of age     | ≥12.0      | 11.0-11.9 | 8.0-10.9 | <8.0   |
| Non-pregnant women <sup>#</sup> | ≥12.0      | 11.0-11.9 | 8.0-10.9 | <8.0   |
| Pregnant women                  | ≥11.0      | 10.0-10.9 | 7.0-9.9  | <7.0   |
| Men <sup>#</sup>                | ≥13.0      | 11.0-12.9 | 8.0-10.9 | <8.0   |

\*hemoglobin in g/dL

<sup>#</sup>15 years of age and above

1. World Health Organisation. Haemoglobin concentrations for the diagnosis of anaemia and assessment of severity 2011 [Available from: <https://www.who.int/vmnis/indicators/haemoglobin.pdf>].
