# Supplementary material for: Model-based assessment of the safety of community interventions with primaquine in sub-Saharan Africa
Source: PubMed Central journal article supplement (PMC8502297; doi:10.1186/s13071-021-05034-4), 2021-10-09

Additional file 3: Figure S2. Goodness-of-fit plots for the pharmacokinetic model.

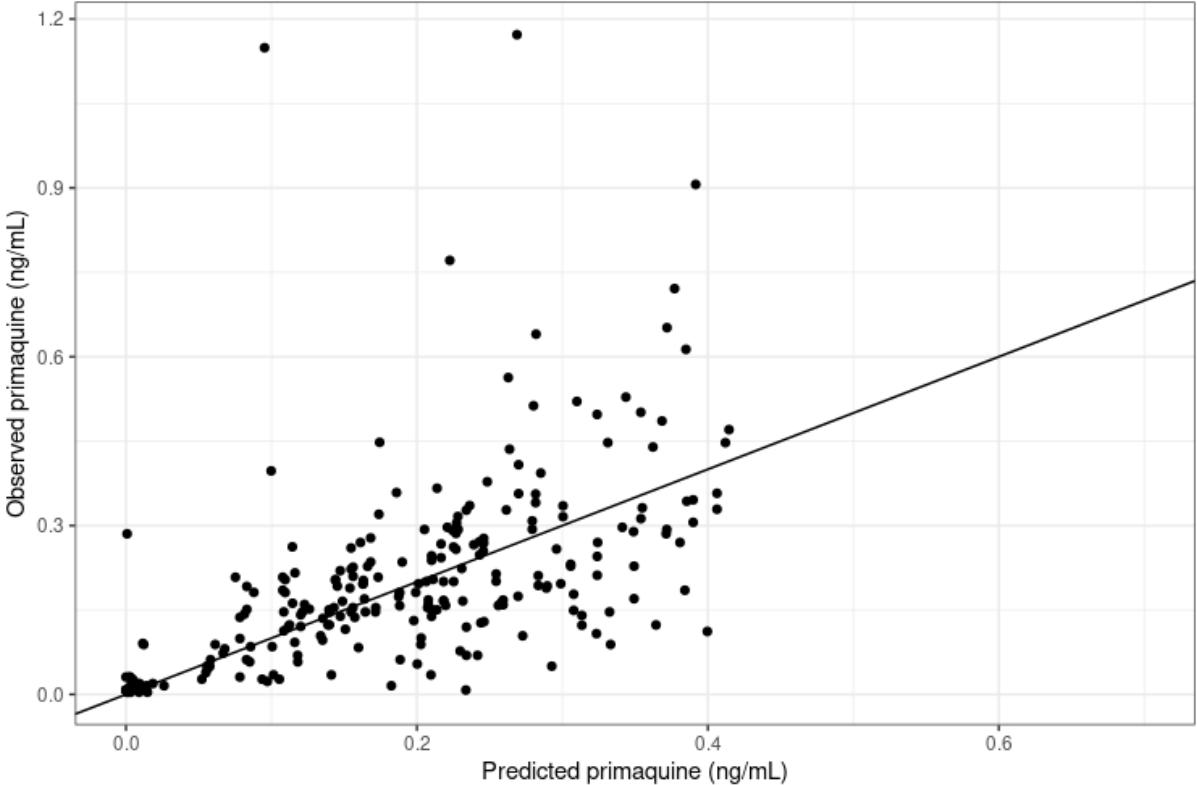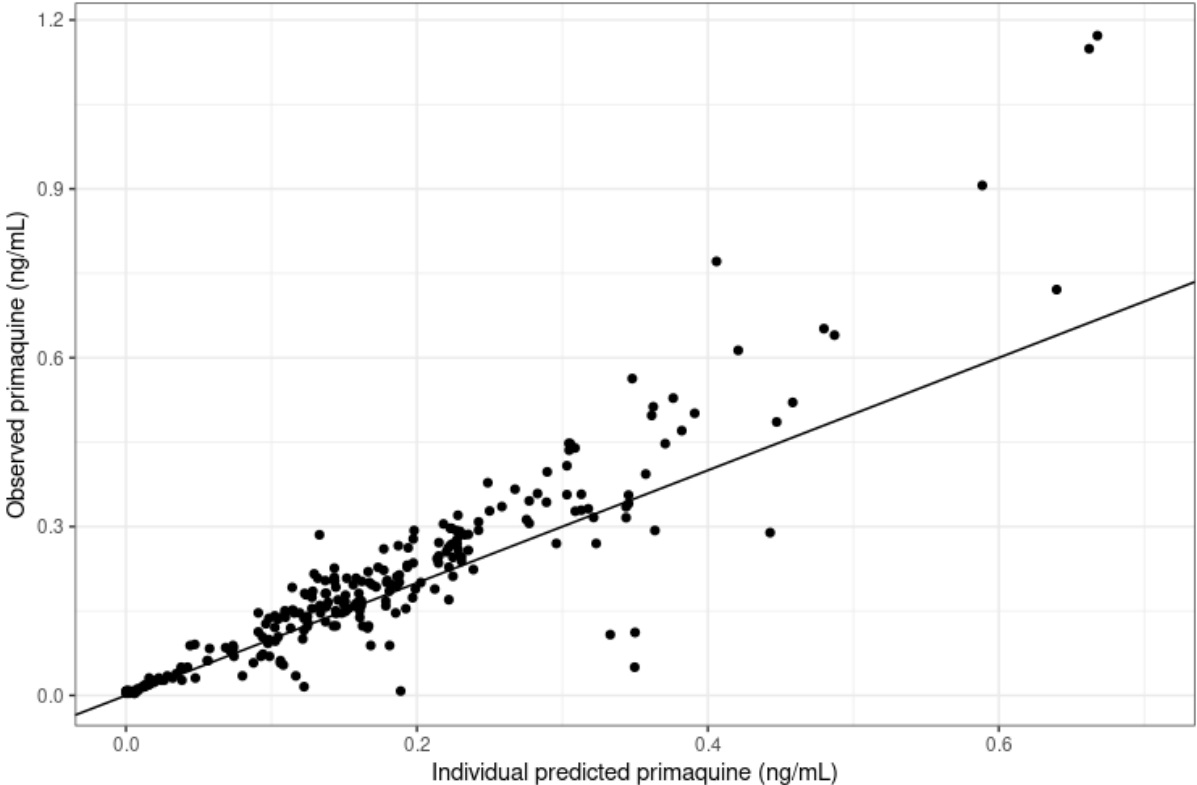

Supplement: 13071_2021_5034_MOESM3_ESM.pdf [file 13071_2021_5034_MOESM3_ESM.pdf]
