# Supplementary material for: Model-based assessment of the safety of community interventions with primaquine in sub-Saharan Africa
Source: PubMed Central journal article supplement (PMC8502297; doi:10.1186/s13071-021-05034-4), 2021-10-09
Supplement: 13071_2021_5034_MOESM5_ESM.pdf [file 13071_2021_5034_MOESM5_ESM.pdf]

**Additional file 5: Model code. NONMEM control stream of the pharmacokinetic/pharmacodynamic model.**

```
$PROB PD
$INPUT ID TIME DV EVID CMT DOSE AMT BLQ SITE AGE HT WT SEX AS PEDI HB HBBASE ICLINT1
ICLINT2 IV IMAT

; AMOUNTS IN UMOL
; CONCENTRATIONS IN UMOL/L
; TIME IN H
; VOLUMES IN L
; HB in g/dL
; ICLINT1, ICLINT2, IV and IMAT are the individual values for these parameters from the PK model

$DATA PQ_PD_DATASET.csv IGNORE=@
$SUBROUTINE ADVAN13 TOL=6
$MODEL COMP=(DOSE) COMP=(TRAN1) COMP=(TRAN2) COMP=(LIVER)
        COMP=(PRIMA) COMP=(HB1) COMP=(HB2) COMP=(HB3) COMP=(HB4) COMP=(METAB)

$PK
; PRIMAQUINE PK
F1      =      1                ; BIOAVAILABILITY
MAT     =      IMAT            ; MEAN ABSORPTION TIME
KA      =      3/MAT           ; ABSORPTION
V       =      IV              ; VOLUME OF DISTRIBUTION CENTRAL

CLINT1  =      ICLINT1
CLINT2  =      ICLINT2
CLINT   =      CLINT1+CLINT2

BSA     =      ((WT**0.425)*(HT**0.725))*0.007184
VL      =      0.722*(BSA**1.176)
QHP     =      90*0.55*((WT/70)**0.75) ; HEPATIC PLASMA FLOW L/H
EH      =      CLINT/(QHP+CLINT)
EH1     =      CLINT1*EH*(1/CLINT)
EH2     =      CLINT2*EH*(1/CLINT)

CLH1    =      EH1*QHP
CLH2    =      EH2*QHP
CLH     =      EH*QHP

S5      =      V

VM      =      1*(WT/70)
CLM     =      1*((WT/70)**0.75)

; PD
BASE    =      HBBASE * EXP(ETA(1)*THETA(4))
LS      =      THETA(1) ; LIFESPAN
KTR     =      4/LS
KIN     =      BASE/LS
```

IF(G6PD.EQ.0) SLOPE = THETA(2) ; SLOPE FOR G6PD NORMAL  
IF(G6PD.EQ.1) SLOPE = THETA(2) \* THETA(3) ; SLOPE FOR G6PD DEFICIENT

A\_0(6) = (BASE/4)  
A\_0(7) = (BASE/4)  
A\_0(8) = (BASE/4)  
A\_0(9) = (BASE/4)

; MASS TRANSPORT

K12 = KA  
K23 = KA  
K34 = KA  
K40 = CLH1/VL  
K45 = (QHP\*(1-(EH1+EH2)))/VL  
K54 = QHP/V  
K100= CLM/VM  
K410= CLH2/VL

\$DES

C5 = A(5)/V  
EFF = SLOPE \* (A(10)/VM)  
DADT(1) = -K12\*A(1) ; DOSE  
DADT(2) = -K23\*A(2) + K12\*A(1) ; TRAN1  
DADT(3) = -K34\*A(3) + K23\*A(2) ; TRAN2  
DADT(4) = -K45\*A(4) - K40\*A(4) - K410\*A(4) + K34\*A(3) + K54\*A(5) ; LIVER  
DADT(5) = -K54\*A(5) + K45\*A(4) ; PRIMA  
DADT(6) = -KTR\*A(6) + KIN - EFF\*A(6) ; HB1  
DADT(7) = -KTR\*A(7) + KTR\*A(6) - EFF\*A(7) ; HB2  
DADT(8) = -KTR\*A(8) + KTR\*A(7) - EFF\*A(8) ; HB3  
DADT(9) = -KTR\*A(9) + KTR\*A(8) - EFF\*A(9) ; HB4  
DADT(10) = -K100\*A(10) + K410\*A(4) ; METAB  
HB = A(6)+A(7)+A(8)+A(9) ; HB

\$ERROR

AA6 = A(6)  
AA7 = A(7)  
AA8 = A(8)  
AA9 = A(9)

IPRED = A(6)+A(7)+A(8)+A(9)  
Y = IPRED + (IPRED \* EPS(1)\*THETA(4))

\$THETA

(0,276) ; 1 LS  
(0,0.0012) ; 2 SLOPE  
(1,2.46) ; 3 GD6PD-SLOPE  
(0,0.0695) ; 4 PROP ERR HB

\$OMEGA

1 FIX ; 1 HB base  
\$SIGMA 1 FIX ; 1 PROP ERR HB
