# Supplementary material for: Model-based assessment of the safety of community interventions with primaquine in sub-Saharan Africa
Source: PubMed Central journal article supplement (PMC8502297; doi:10.1186/s13071-021-05034-4), 2021-10-09
Supplement: 13071_2021_5034_MOESM6_ESM.pdf [file 13071_2021_5034_MOESM6_ESM.pdf]

**Additional file 6: Table S2. Predicted median reduction in hemoglobin after 0.25 and 0.4 mg/kg primaquine stratified by CYP2D6 activity score group.**

| CYP2D6 activity score | Primaquine dose, mg/kg | Median reduction in Hb, g/dL | 90% prediction interval of reduction in Hb, g/dL* |
|-----------------------|------------------------|------------------------------|---------------------------------------------------|
| 0                     | 0.25                   | 0                            | -                                                 |
|                       | 0.4                    | 0                            | -                                                 |
| 0.5                   | 0.25                   | 0.08                         | 0.04-0.12                                         |
|                       | 0.40                   | 0.12                         | 0.06-0.20                                         |
| 1                     | 0.25                   | 0.14                         | 0.07-0.22                                         |
|                       | 0.4                    | 0.22                         | 0.12-0.36                                         |
| 1.5                   | 0.25                   | 0.19                         | 0.10-0.31                                         |
|                       | 0.4                    | 0.30                         | 0.16-0.49                                         |
| 2                     | 0.25                   | 0.23                         | 0.12-0.37                                         |
|                       | 0.4                    | 0.37                         | 0.20-0.58                                         |
| 3                     | 0.25                   | 0.30                         | 0.17-0.45                                         |
|                       | 0.4                    | 0.47                         | 0.27-0.70                                         |

\*Prediction interval resulting from inter-individual variability
