# Supplementary material for: Model-based assessment of the safety of community interventions with primaquine in sub-Saharan Africa
Source: PubMed Central journal article supplement (PMC8502297; doi:10.1186/s13071-021-05034-4), 2021-10-09
Supplement: 13071_2021_5034_MOESM9_ESM.pdf [file 13071_2021_5034_MOESM9_ESM.pdf]

**Additional file 9: Table S3. Predicted prevalence of anemia and its severity after 0.25 and 0.4 mg/kg primaquine when heterozygous females are included in the G6PD deficient group.**

| Population     | Dosing regimen, mg/kg | No anemia (Hb >11-13 g/dL), % | All anemia grades (Hb <11-13 g/dL), % | Mild anemia (Hb 7-11 to 11-13 g/dL), % | Moderate anemia (Hb 7-8 to 7-11 g/dL), % | Severe anemia (Hb <7-8 g/dL), % |
|----------------|-----------------------|-------------------------------|---------------------------------------|----------------------------------------|------------------------------------------|---------------------------------|
| All            | 0                     | 57.0                          | 43.0                                  | 18.3                                   | 22.0                                     | 2.73                            |
|                | 0.25                  | 52.6                          | 47.4                                  | 19.6                                   | 24.7                                     | 3.02                            |
|                | 0.40                  | 50.0                          | 50.0                                  | 20.2                                   | 26.5                                     | 3.24                            |
| G6PD normal    | 0                     | 58.3                          | 41.7                                  | 18.2                                   | 20.9                                     | 2.60                            |
|                | 0.25                  | 55.0                          | 45.0                                  | 19.3                                   | 22.8                                     | 2.81                            |
|                | 0.40                  | 53.0                          | 47.0                                  | 19.9                                   | 24.2                                     | 2.96                            |
| G6PD deficient | 0                     | 50.6                          | 49.4                                  | 18.9                                   | 27.2                                     | 3.34                            |
|                | 0.25                  | 41.5                          | 58.5                                  | 21.0                                   | 33.6                                     | 3.43                            |
|                | 0.40                  | 36.0                          | 64.0                                  | 21.9                                   | 37.6                                     | 4.56                            |
